# Supplementary material for: Mimicking natural electrical environment with cellulose acetate scaffolds enhances collagen formation of osteoblasts
Source: Royal Society of Chemistry journal article supplement (doi:10.1039/d3nr00014a), 2023-01-01
Supplement: d3nr00014a1.pdf [file d3nr00014a1.pdf]

## Supporting Information

### Mimicking natural electrical environment with cellulose acetate scaffolds enhances collagen formation of osteoblasts

Piotr K. Szewczyk<sup>1</sup>, Krzysztof Berniak<sup>1</sup>, Joanna Knapczyk-Korczak<sup>1</sup>, Joanna E. Karbowniczek<sup>1</sup>, Mateusz M. Marzec<sup>2</sup>, Andrzej Bernasik<sup>2,3</sup> and Urszula Stachewicz<sup>1\*</sup>

<sup>1</sup>Faculty of Metals Engineering and Industrial Computer Science, AGH University of Science and Technology, Al. Mickiewicza 30, 30-059 Kraków, Poland

<sup>2</sup>Academic Centre for Materials and Nanotechnology, AGH University of Science and Technology, Poland

<sup>3</sup>Faculty of Physics and Applied Computer Science, AGH University of Science and Technology, Poland

\*E-mail: [ustachew@agh.edu.pl](mailto:ustachew@agh.edu.pl)

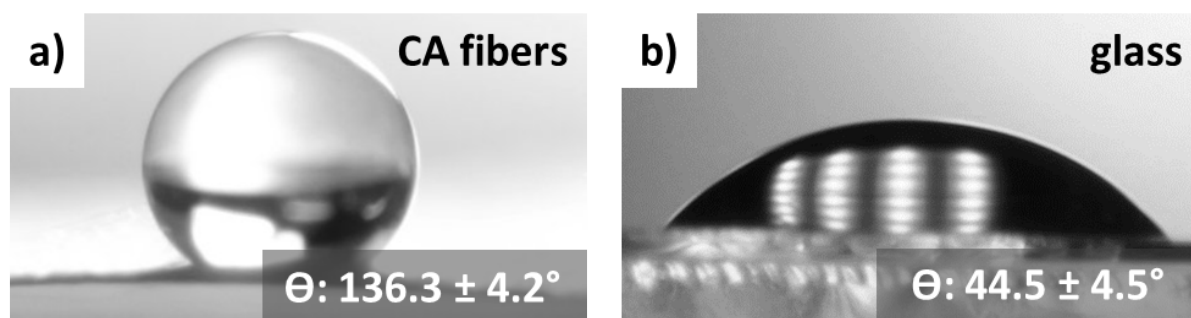

**Figure S1.** Exemplary contact angle ( $\Theta$ ) measurements of a) CA fibers and b) glass control.

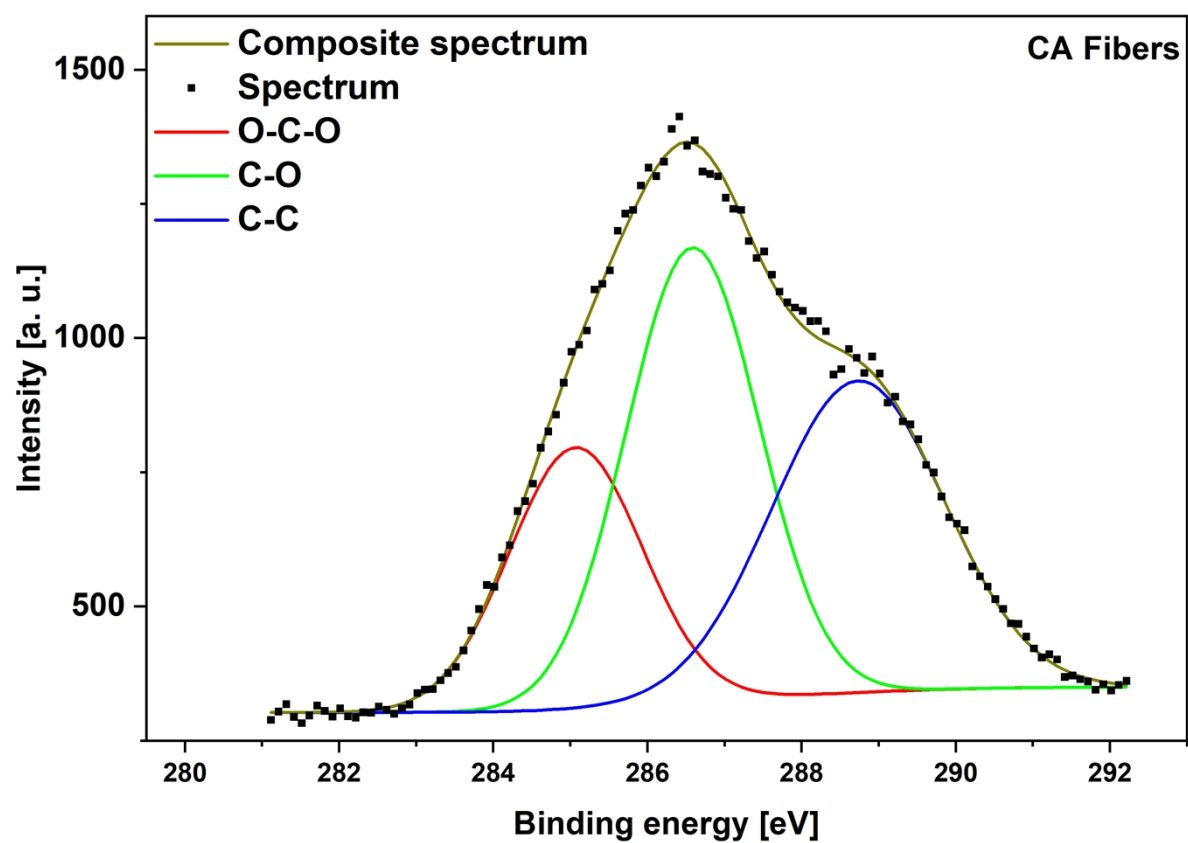

**Figure S2.** XPS spectra from measurements at 45° for CA electrospun fibers.

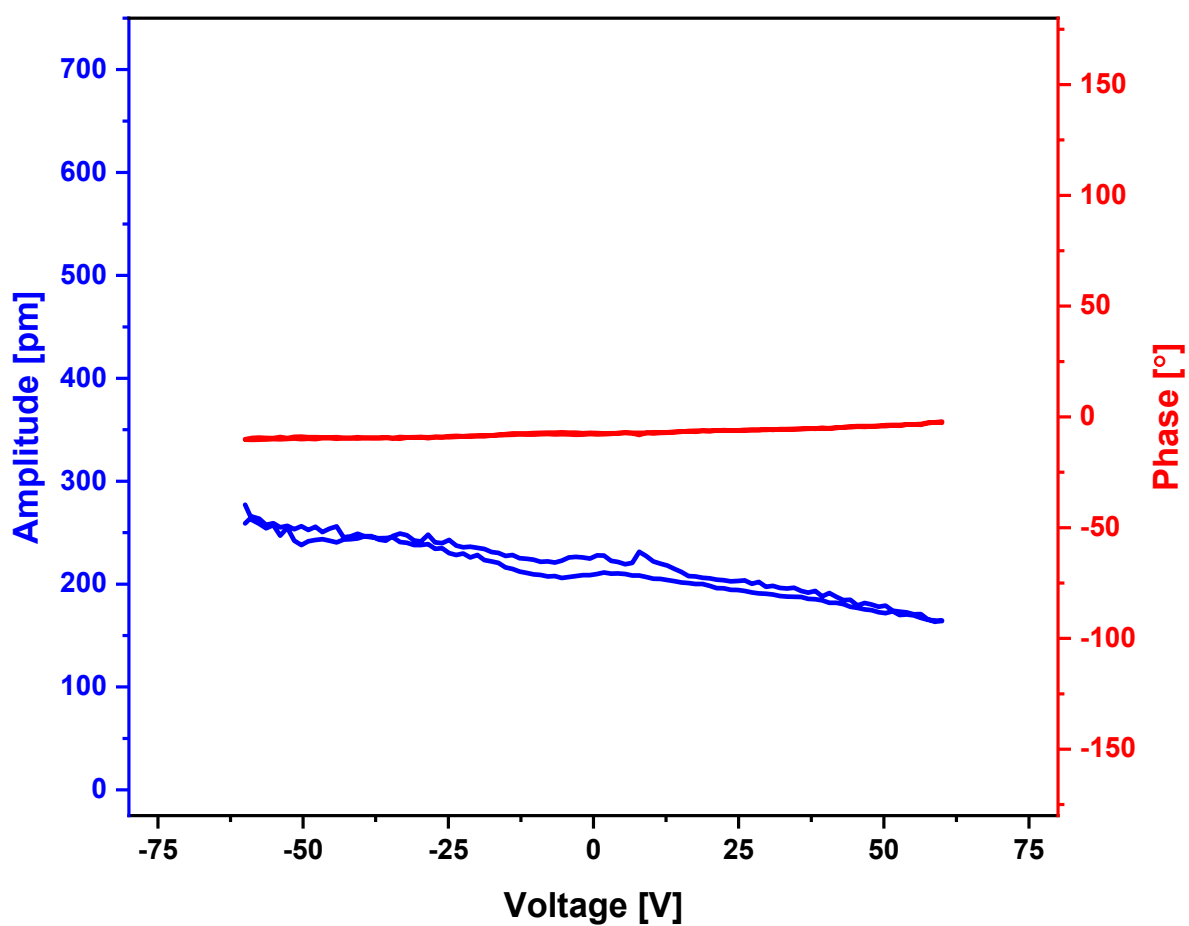

**Figure S3.** Measurement of piezoresponse in d33 direction on CA fiber showing no piezoelectric response. (Scale used is the same as for  $d_{31}$  measurement)

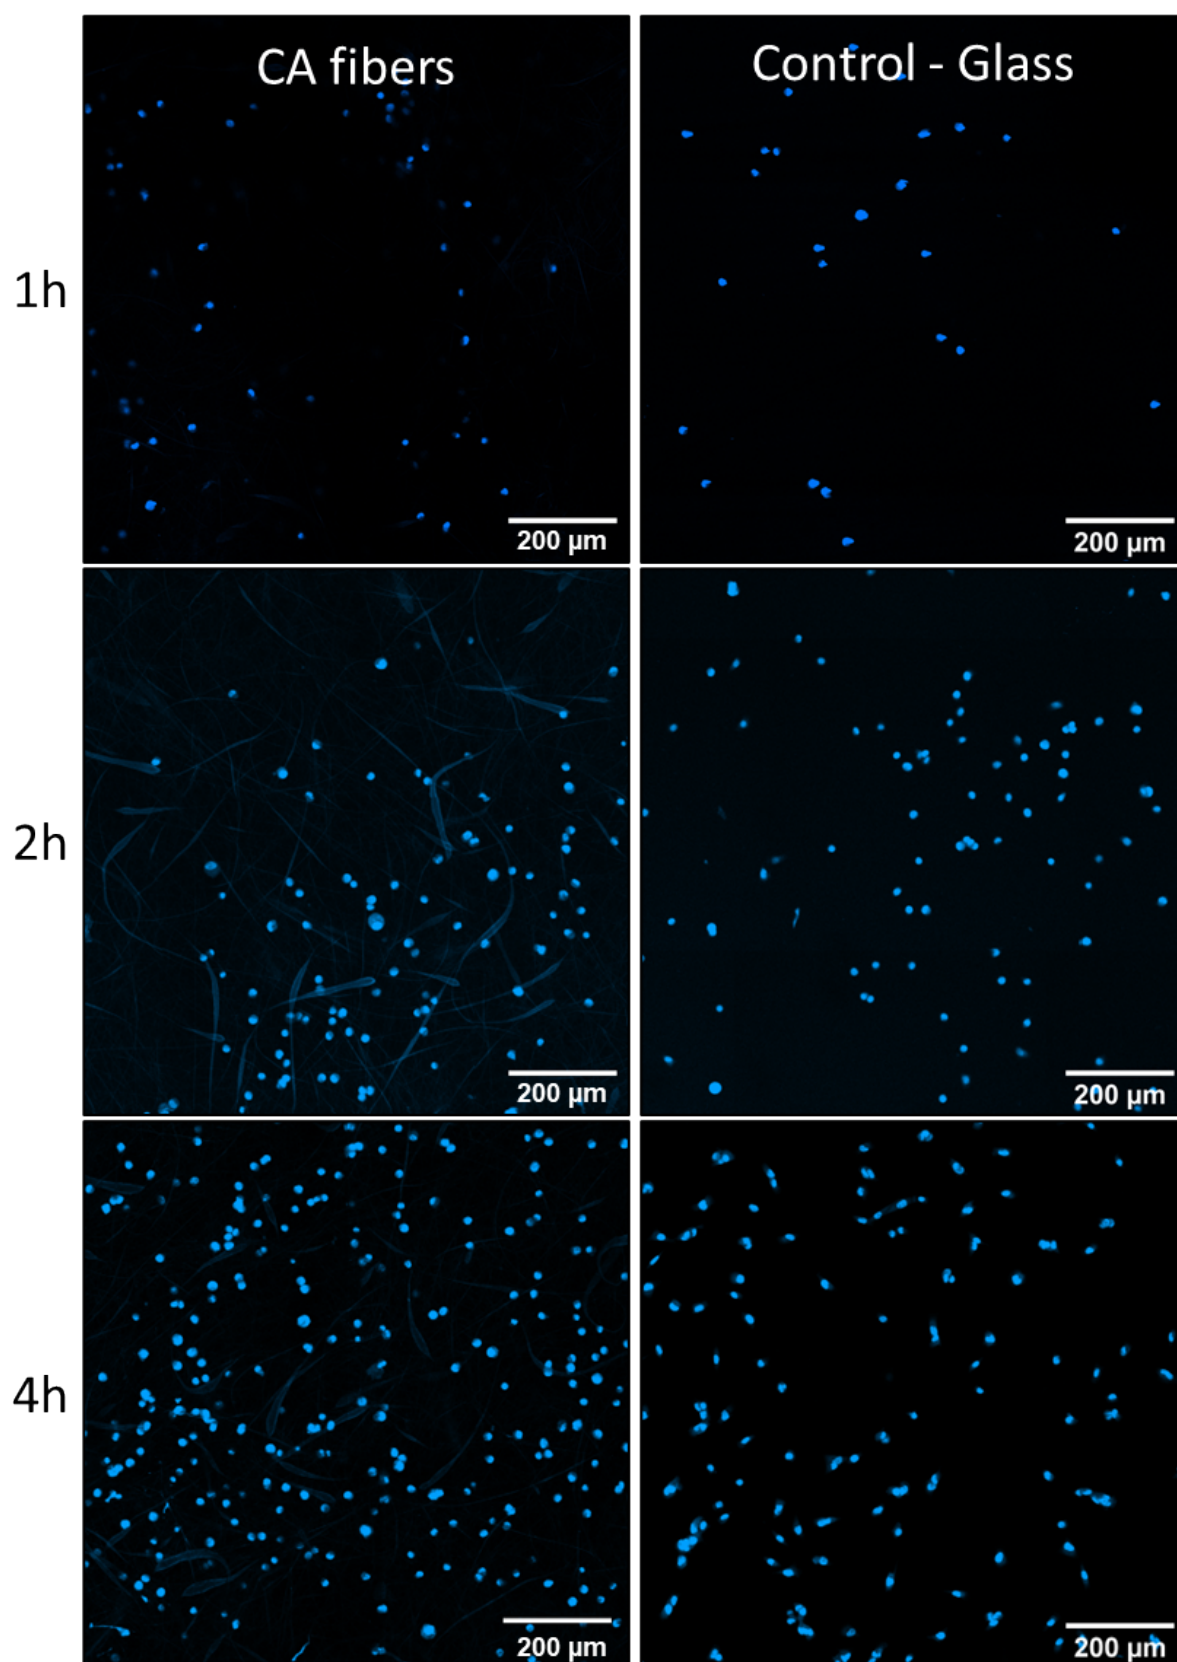

**Figure S4.** Confocal microscopy images of cells used for adhesion test for 1, 2 and 4 h on CA electrospun fibers and control surface – glass.

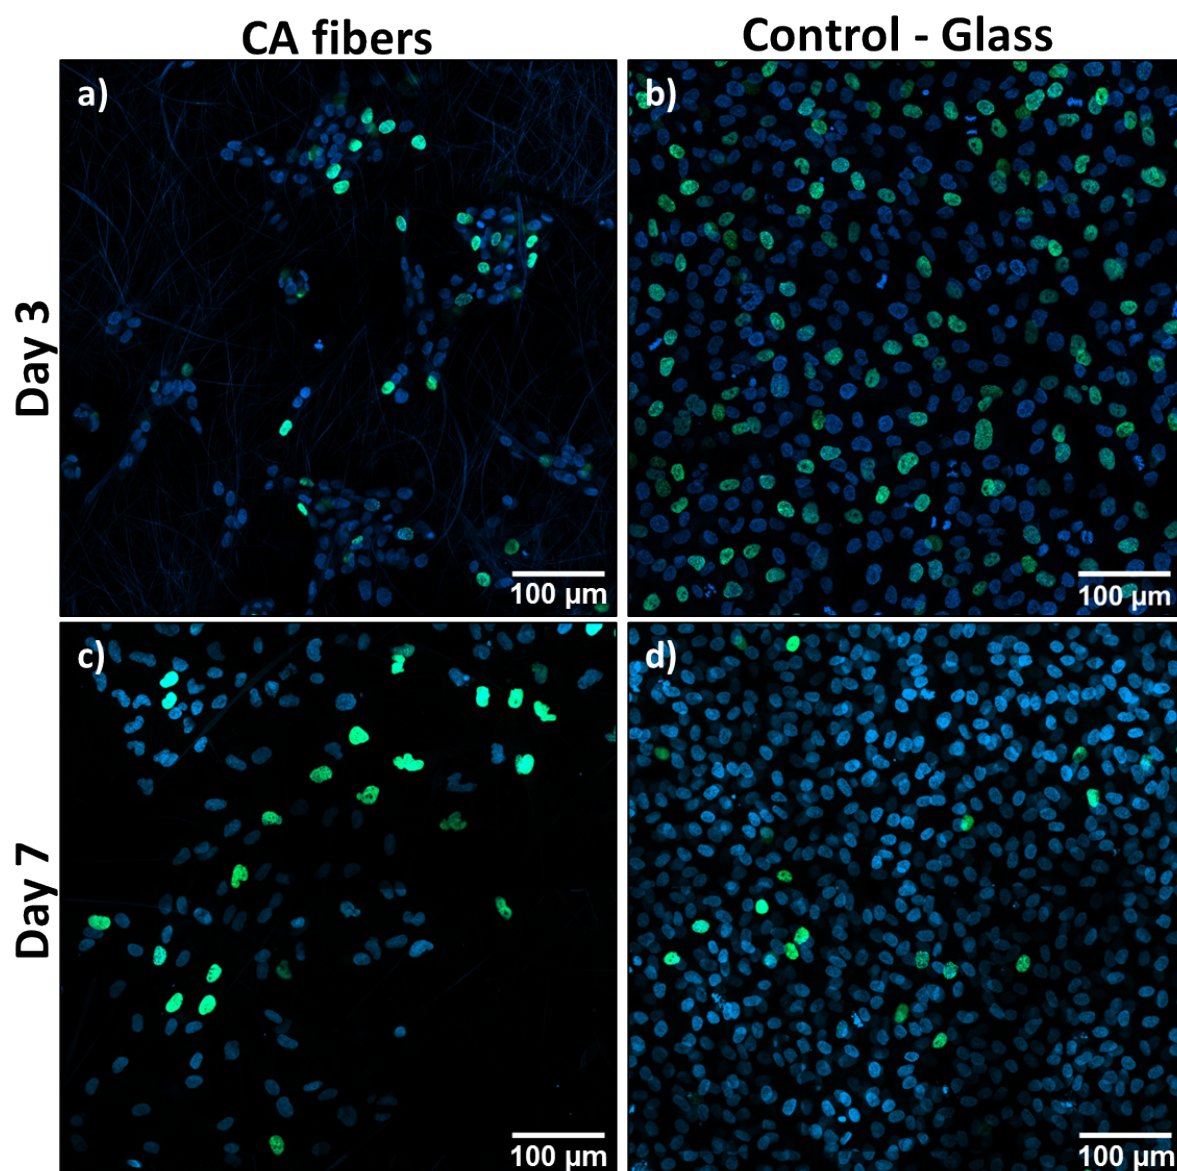

**Figure S5.** Confocal images from replication tests after 3 and 7 days of incubation. Replicating cells (green) were stained with Click-iT™ EdU AF488 imaging kit and the nuclei were counterstained with DAPI (blue).

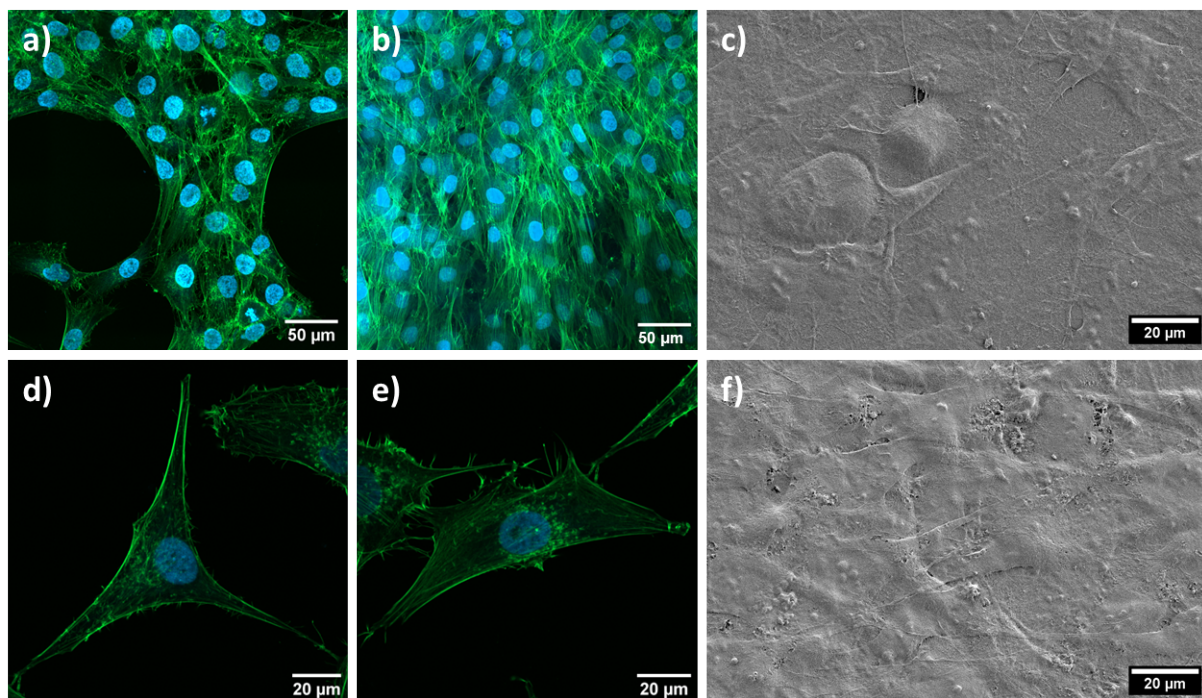

**Figure S6.** Actin fibers imaging from confocal microscopy with corresponding SEM images of cells growing on glass at a-c) day 3 and d-f) day 7 of cell culture. The nuclei were stained with DAPI (blue) and the actin filaments with Alexa Fluor™ 488 Phalloidin (green).
